# Supplementary material for: The dynamics of HIV transmission in out of school young heterosexual men in South Africa: a systematic scoping review protocol
Source: Springer Nature journal article supplement (doi:10.1186/s13643-016-0398-y), 2017-01-17

Identification

Screening

Eligibility

Included

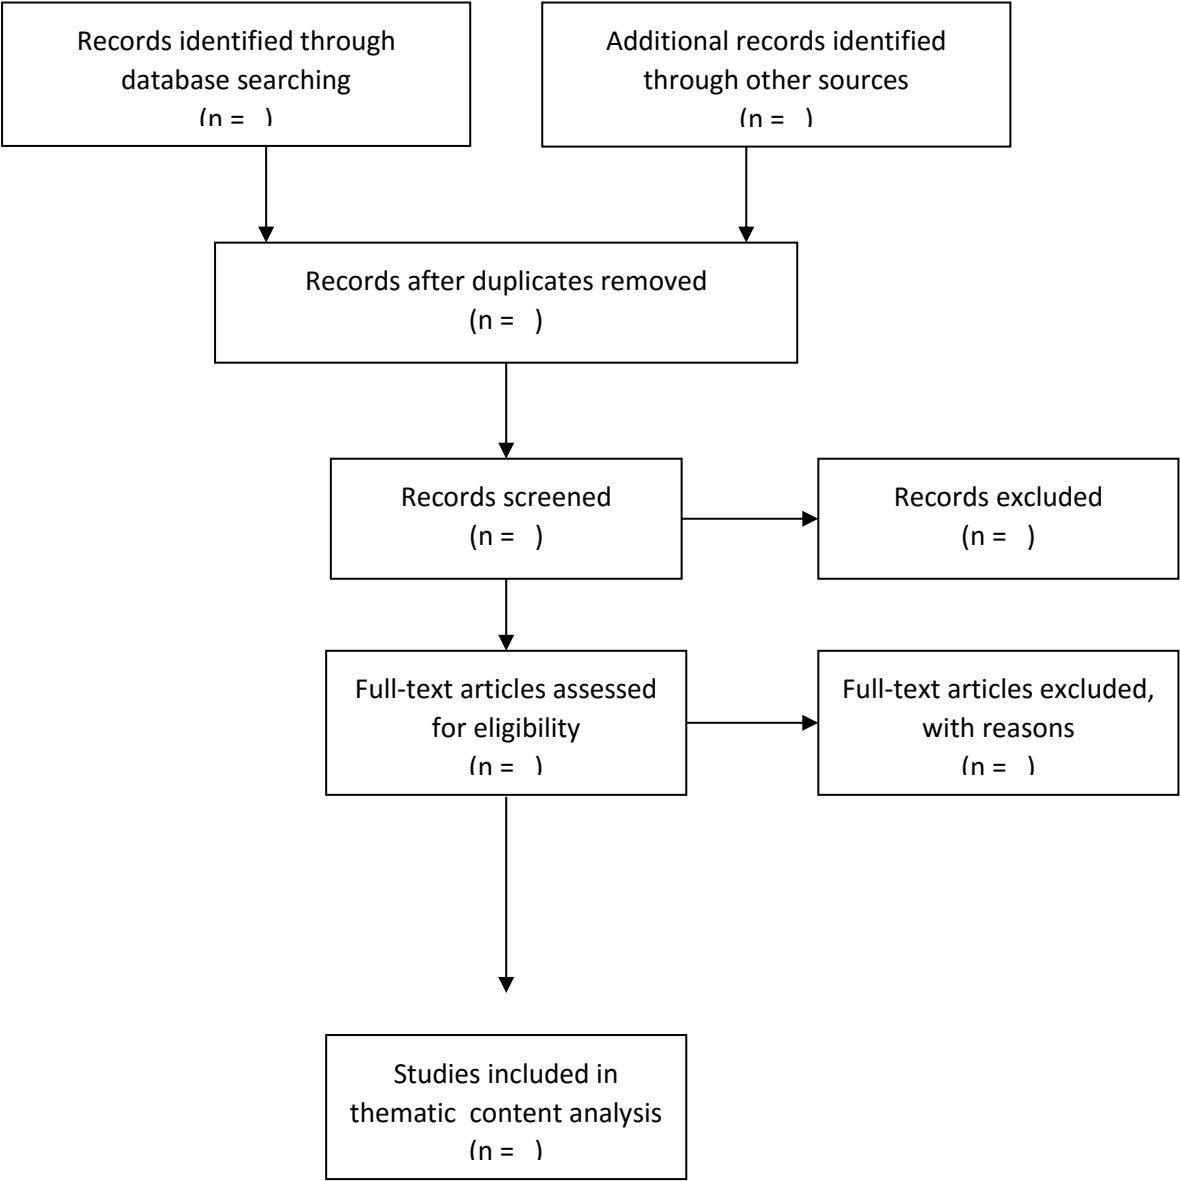

Supplement: MOESM3 [file 12003708]
